# Supplementary material
Source: PubMed Central journal article supplement (PMC6445737)

# Supplementary Figure 1

A

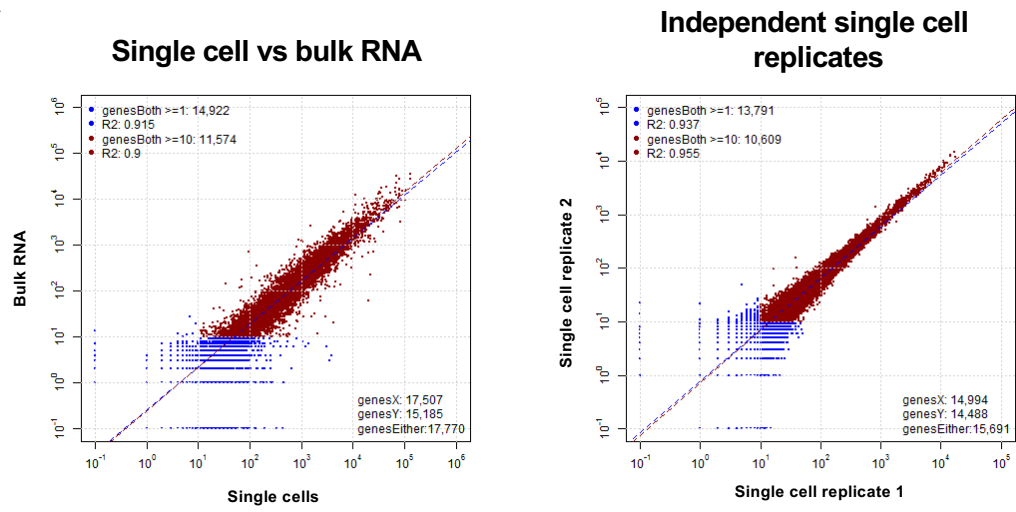

B

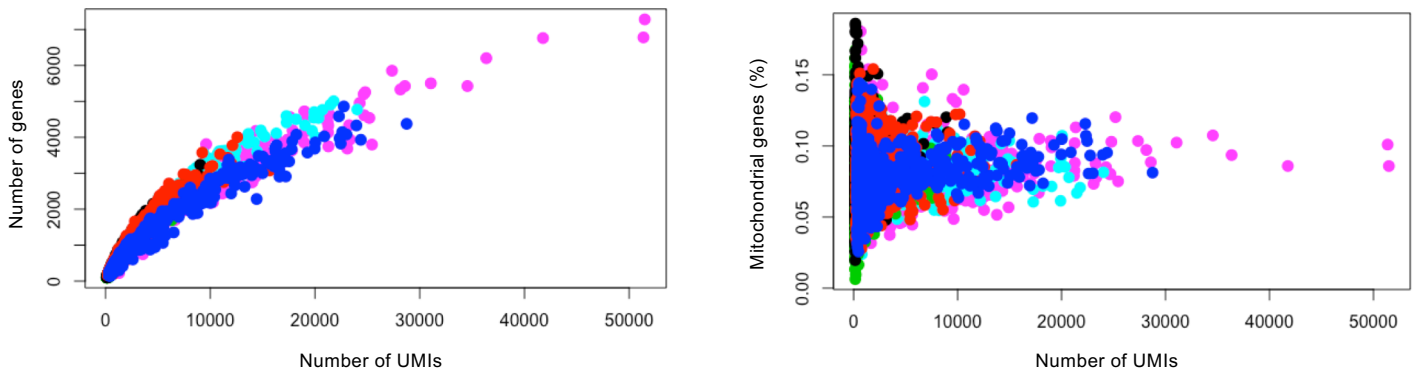

C

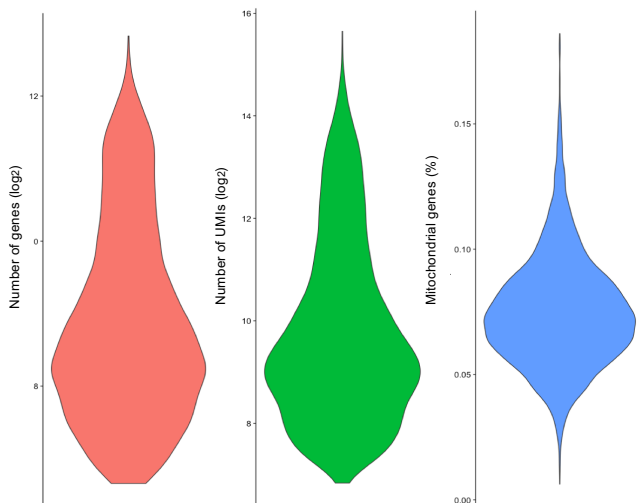

D

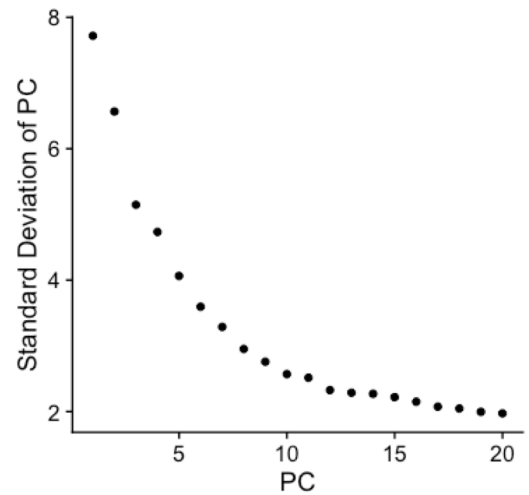

Supplement: NIHMS1511610-supplement-1.pdf [file NIHMS1511610-supplement-1.pdf]

Supplementary Figure 2

A

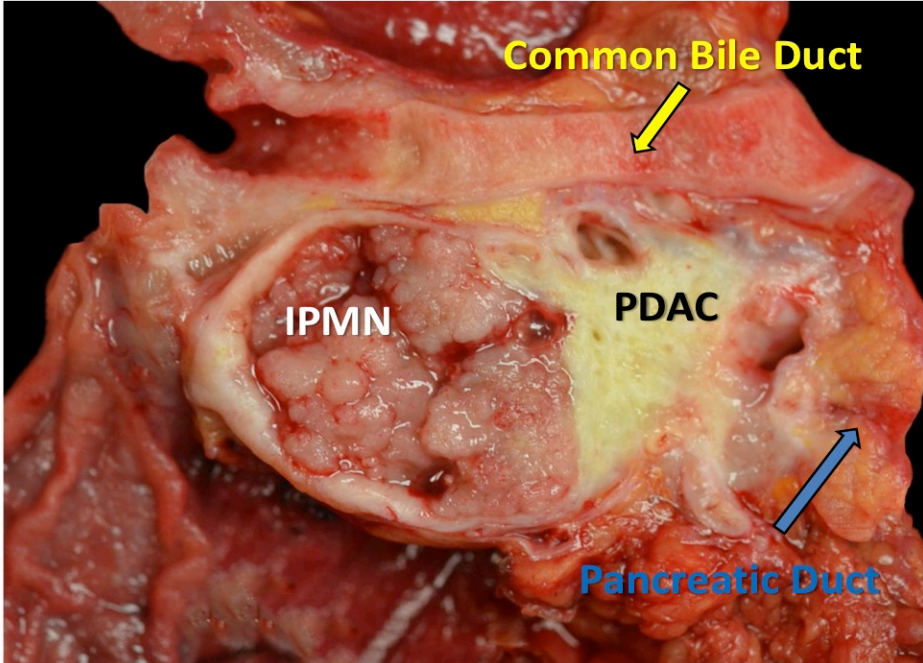

B

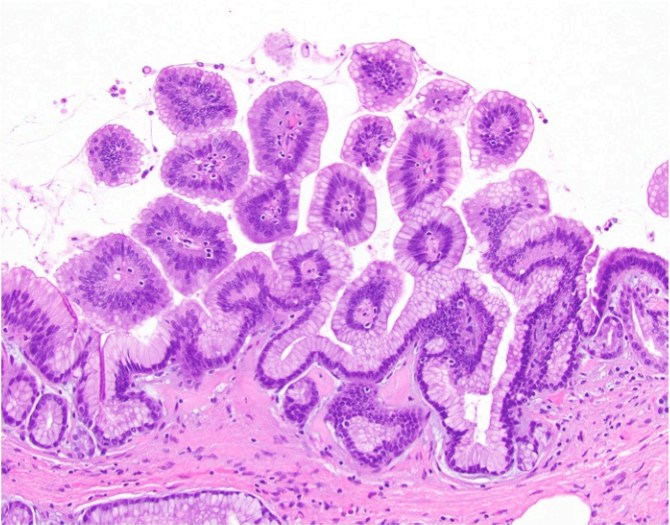

LGD IPMN

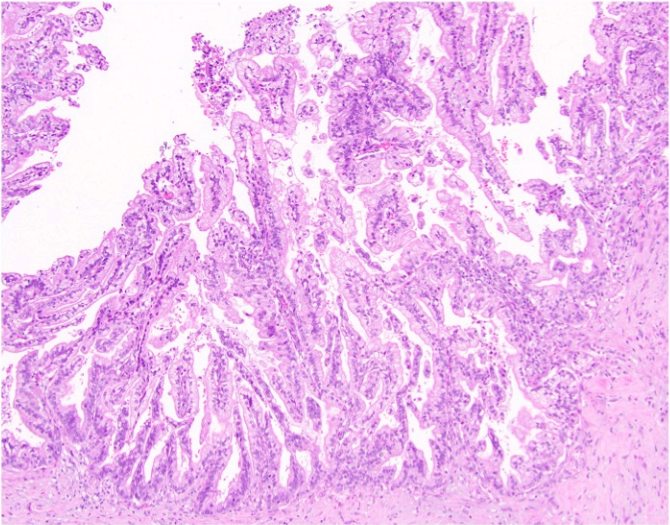

HGD IPMN

Supplement: NIHMS1511610-supplement-2.pdf [file NIHMS1511610-supplement-2.pdf]

# Supplementary Figure 3

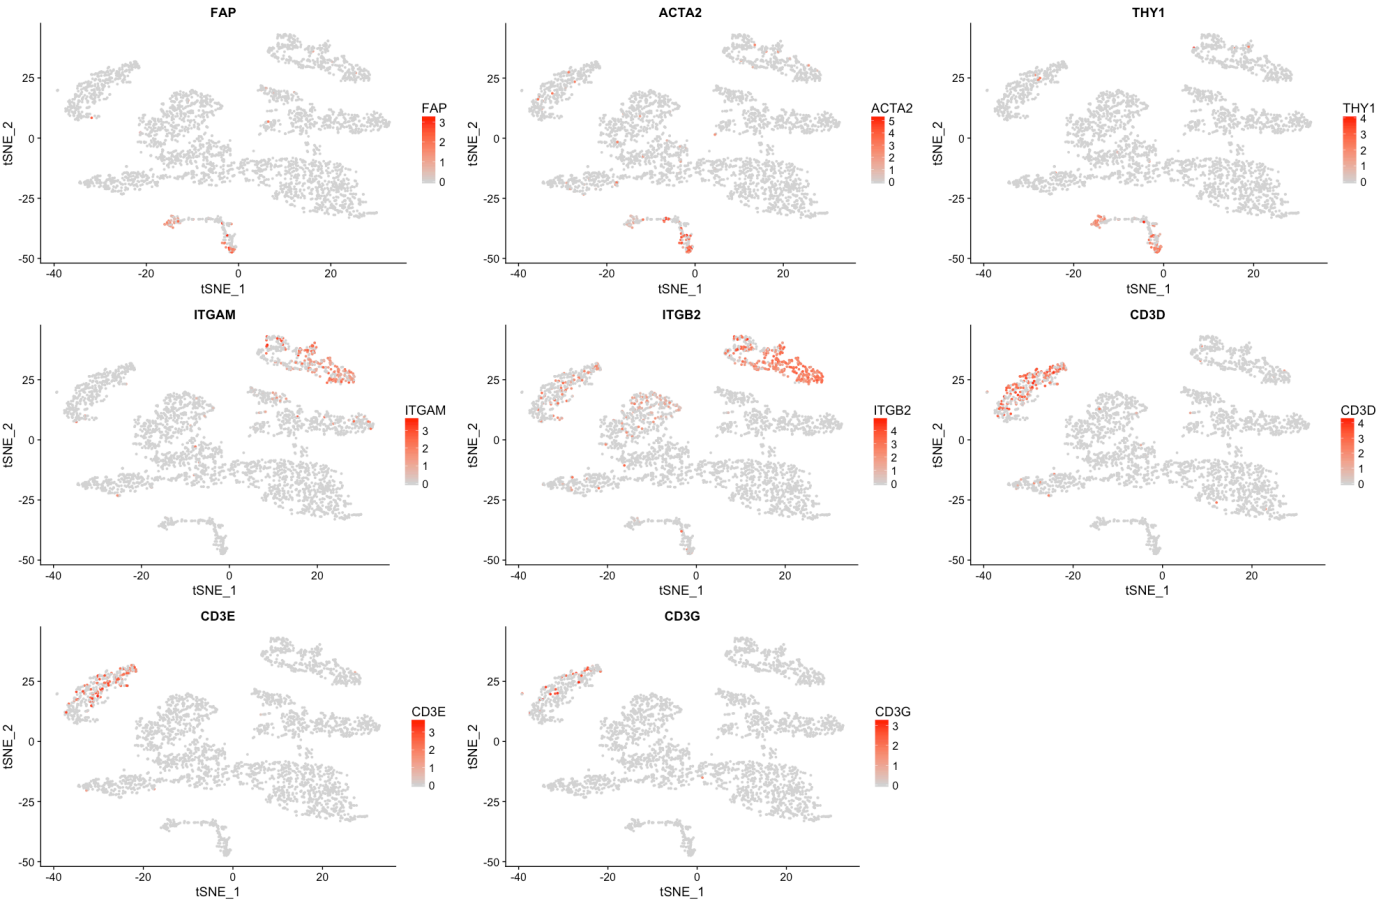

Supplement: NIHMS1511610-supplement-3.pdf [file NIHMS1511610-supplement-3.pdf]

# Supplementary Figure 4

A

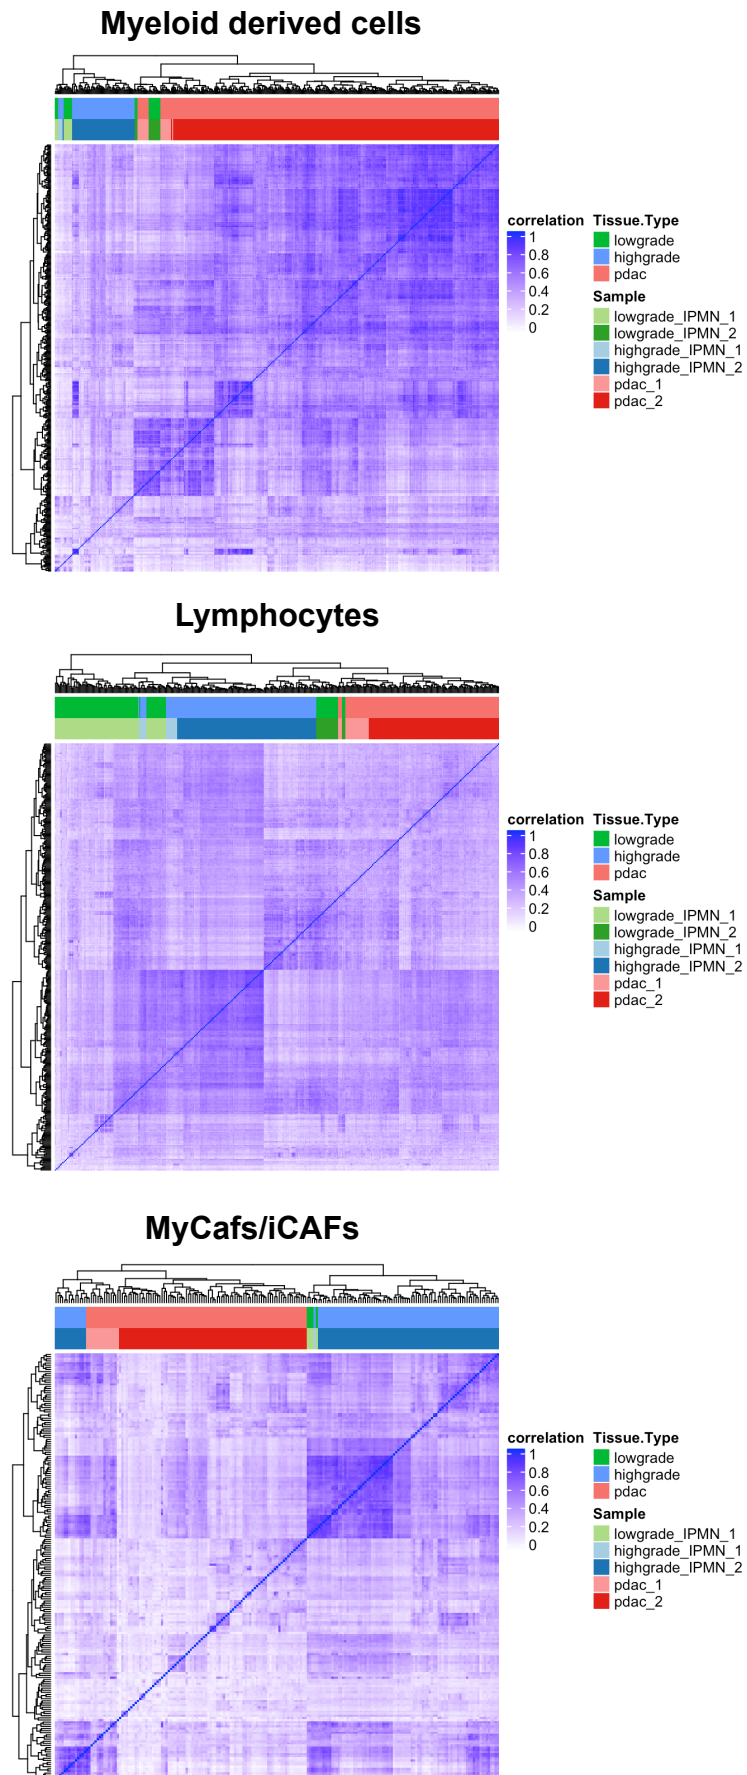

Supplement: NIHMS1511610-supplement-4.pdf [file NIHMS1511610-supplement-4.pdf]

Supplementary Figure 5

A

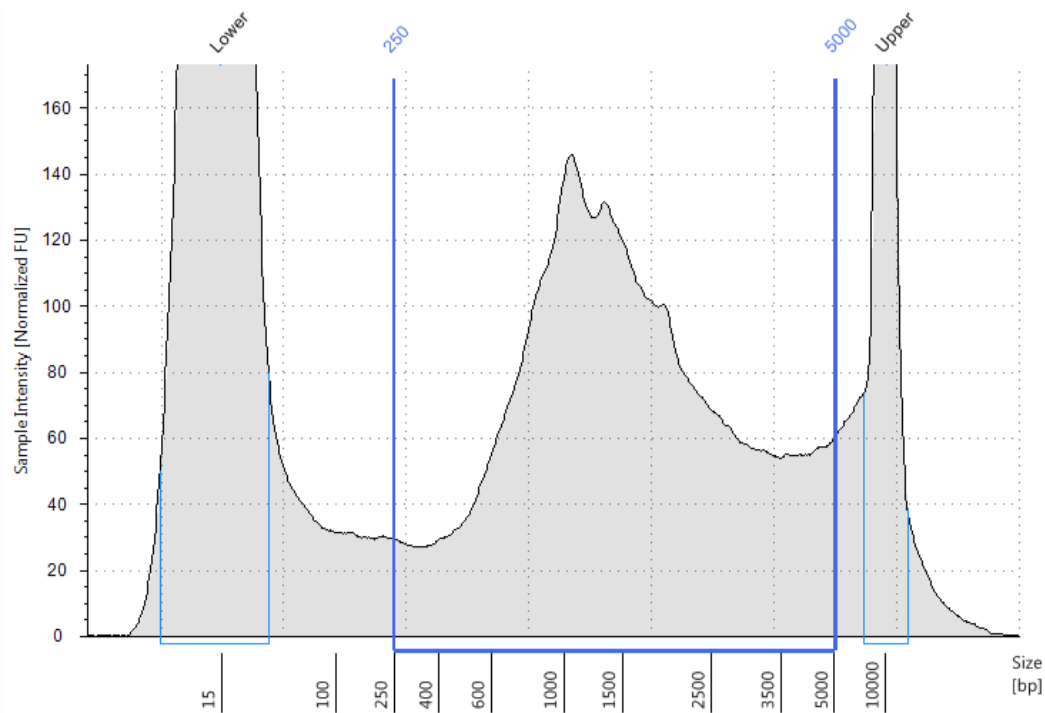

B

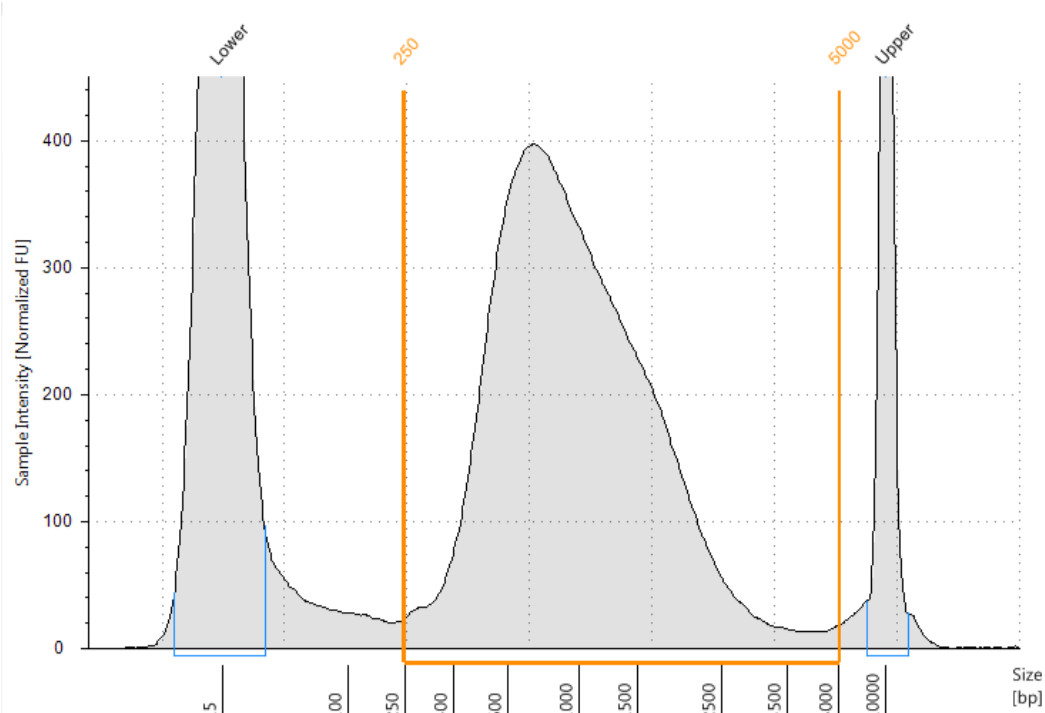

Supplement: NIHMS1511610-supplement-5.pdf [file NIHMS1511610-supplement-5.pdf]
